# Supplementary material
Source: Research Square preprint supplement (doi:10.21203/rs.3.rs-10154106/v1)
Supplement: Supplementary file 1 [file ec8dccea04056fddc7c040a3.docx]

**Graphical abstract:**

The roughness of metallic nickel and cobalt has been reduced effectively in a suitable electrolytic bath, namely, 1 M ChCl: 2 M Lac. The surface smoothness of metallic nickel and cobalt is 78% and 51%, respectively.
